# Supplementary material
Source: PubMed Central journal article supplement (PMC4634079)
Supplement: supp_pp.15.01039_PP2015-01039R1_Supplemental_Figures_S1_S7.pdf [file supp_pp.15.01039_PP2015-01039R1_Supplemental_Figures_S1_S7.pdf]

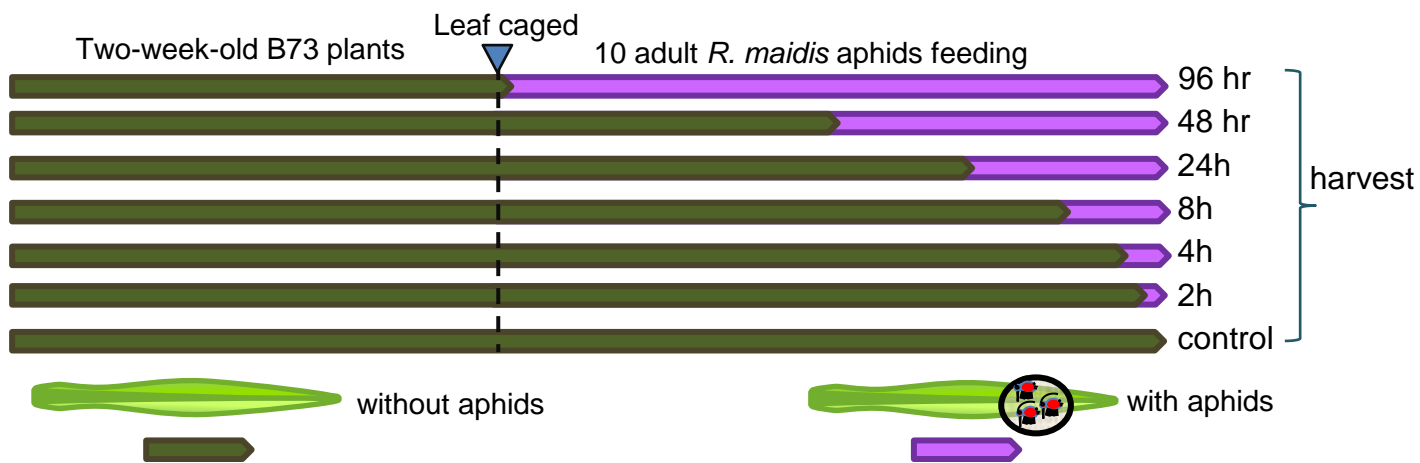

**Supplemental Figure S1.** Design of the aphid feeding experiments. The 2<sup>nd</sup> leaf of two-week-old B73 maize plants was enclosed in a cage. At staggered intervals, 10 adult *R. maidis* aphids were added to each cage. Leaf tissue was harvested after 2 to 96 h of aphid feeding. All samples were harvested within a 4 h time frame, with two sets of control samples at the beginning and end of harvest period, respectively. Harvested tissue was used for assays of gene expression by Illumina sequencing, as well as for metabolite profiling by GC/MS, LC/MS, and HPLC.

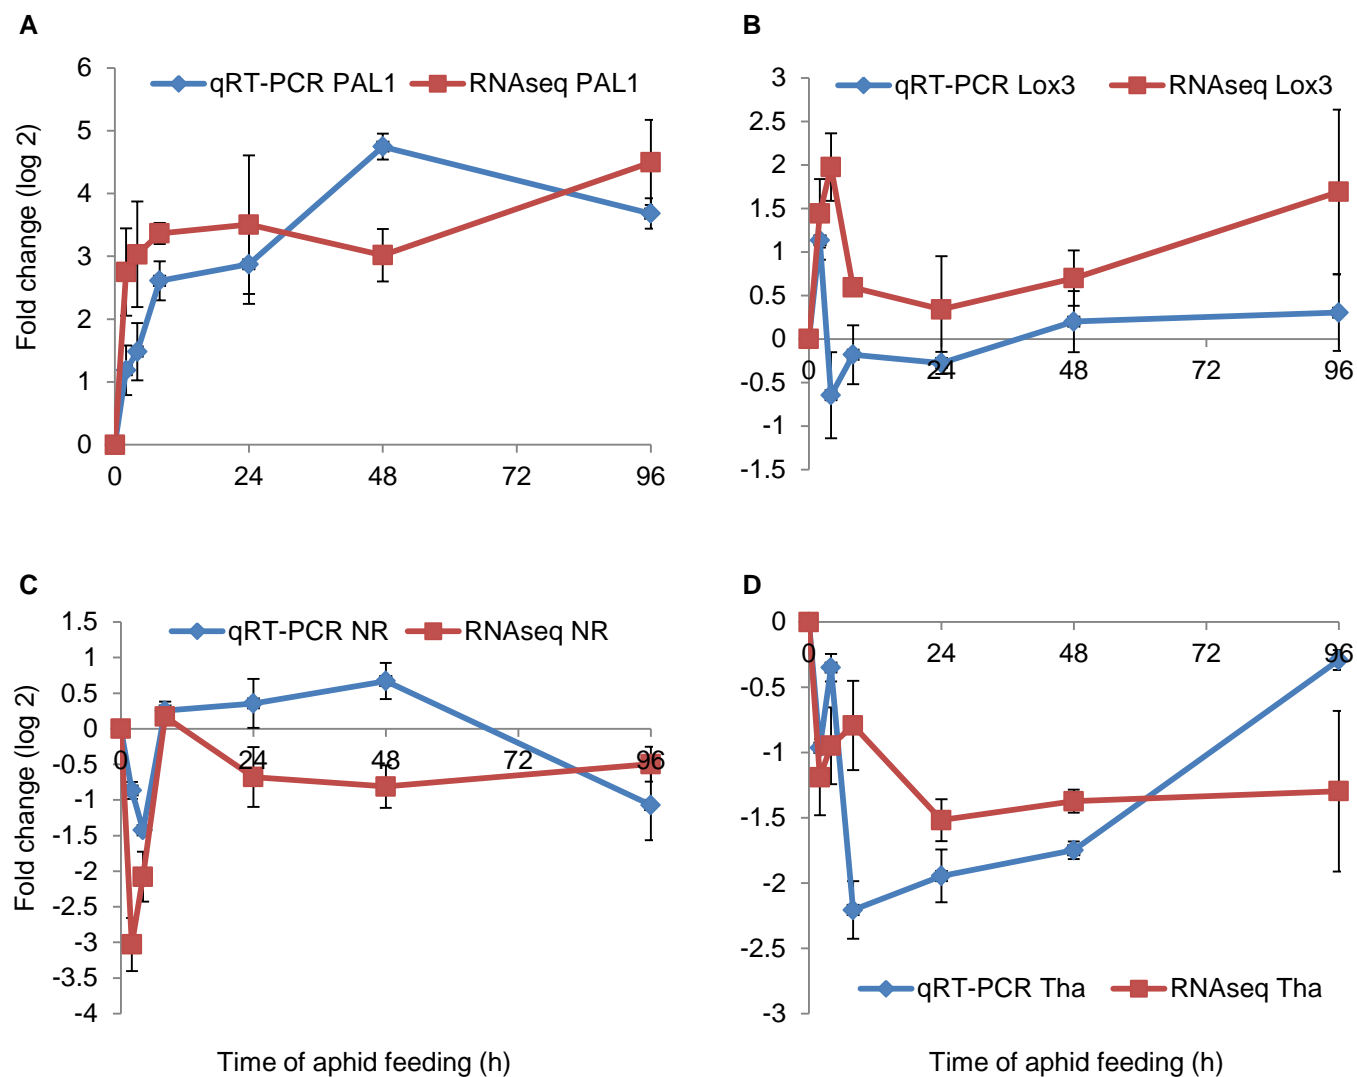

**Supplemental Figure S2.** Comparison of RNAseq and qRT-PCR gene expression data. The following genes were measured by qRT-PCR: A) GRMZM2G063917 Phe Ammonia-Lyase (*PAL*), B) GRMZM2G109130 Lipoxygenase3 (*Lox3*), C) GRMZM2G102959 Nitrite reductase (*NR*), and D) GRMZM2G346861 Thaumatin-like protein 1 (*Tha*). Mean  $\pm$  SE of  $n = 5$ . \* $P < 0.05$  Student's t-test relative to uninfested controls, fold change in Log<sub>2</sub>.

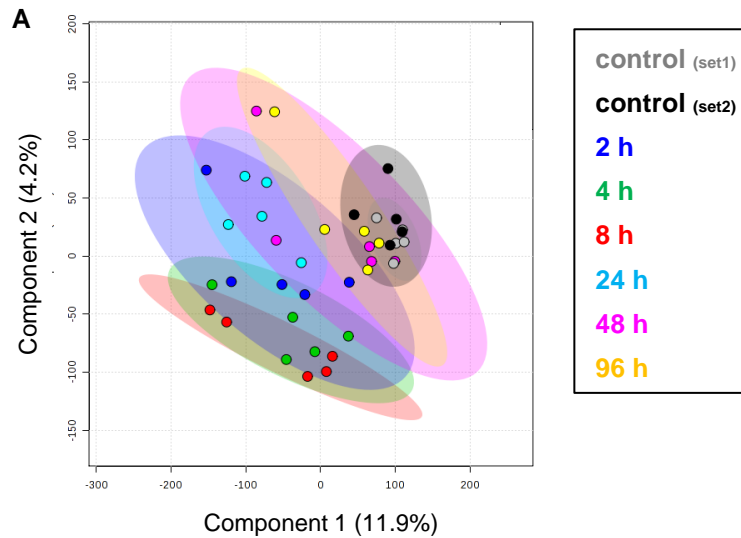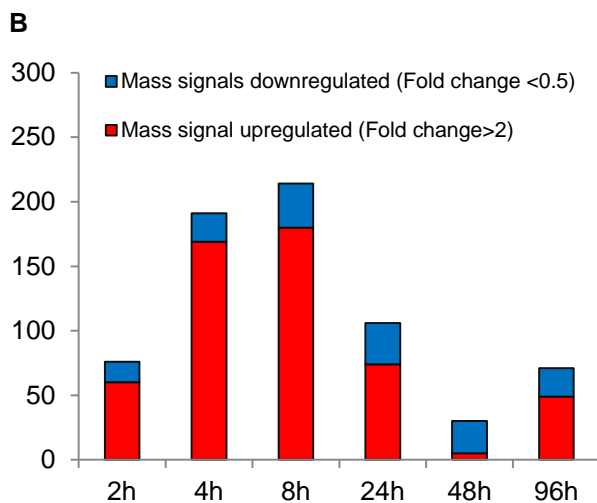

**Supplemental Figure S3.** Metabolites overview of aphids feeding on maize foliage. Partial least squares Discriminant Analysis (PLS-DA) plots of metabolites in maize inbred line B73 leaves infested with aphids for a time course of 0 to 96 hours. A) PLS-DA of 334 mass signals (positive ion mode). Ovals indicate 95% confidence intervals. B) Number of mass signals significantly different from aphid-free controls.  $P < 0.05$  FDR and fold change  $> 2$  or  $< 0.5$ .

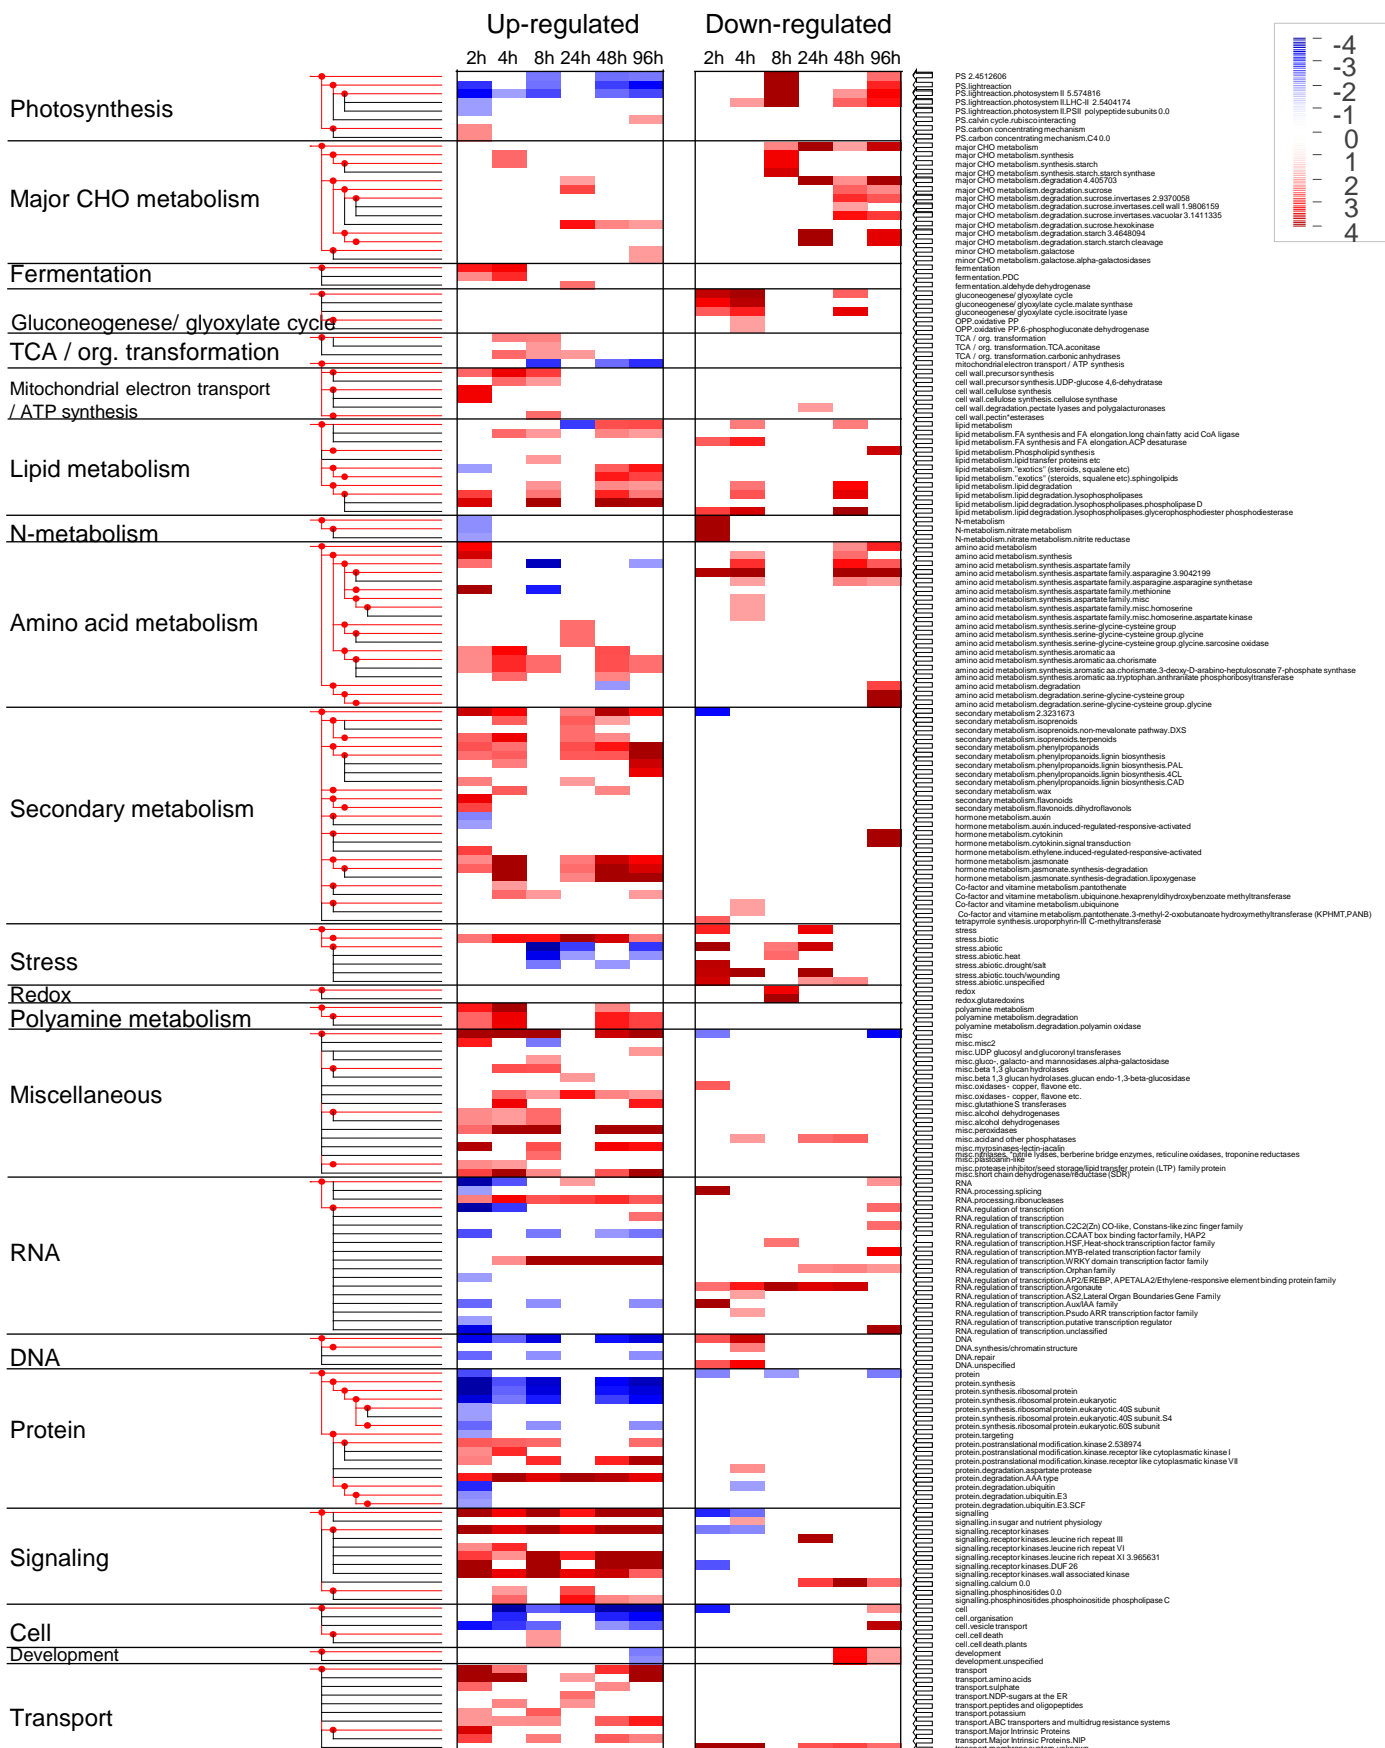

**Supplemental Figure S4.** Enriched terms of MapMan categories of significant differential genes altered by aphid feeding. Enrichment of each category was tested with Fisher's exact test. Red and blue boxes indicate categories that are overrepresented or underrepresented, respectively ( $\alpha = 0.05$ ). The figure was created with PageMan software and subsequently modified.

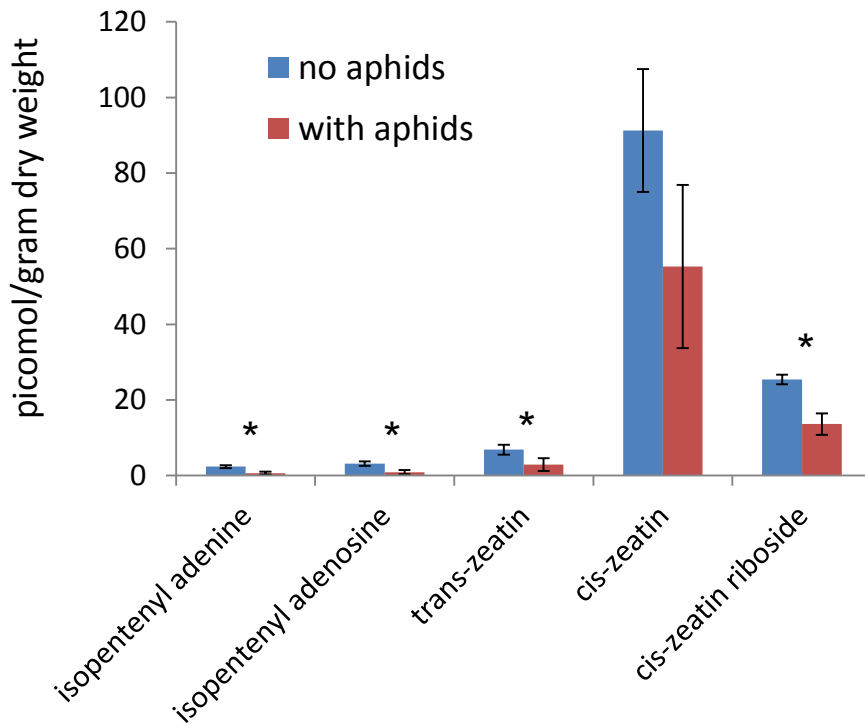

**Supplemental Figure S5.** Cytokinin content in maize leaves with or without ten days of aphid feeding. Mean  $\pm$  s.e. of  $n = 4$ ,  $*P < 0.05$ , Student  $t$ -test.

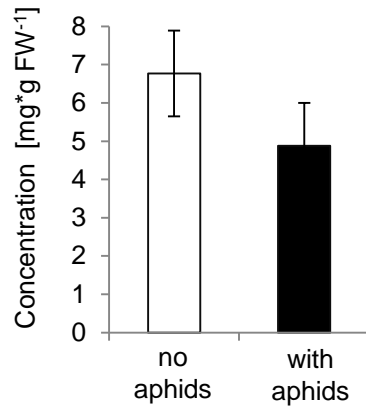

**Supplemental Figure S6.** DIMBOA-Glc content of wildtype W22, with and without aphid feeding for 7 days. Mean  $\pm$  s.e. of  $n = 4$ . No significant difference,  $P > 0.05$ .

**Supplemental Figure S7. Comparison of TPS2 and TPS3 from B73 and W22 A ) amino acid sequence. B) Genomic DNA sequence. Start = green highlights, exons = yellow highlights, stop = red highlights. Blue font = Ds insertion GSS name B.S08.0585\_JSR05 flanking sequence.**

**A CLUSTAL 2.1 multiple sequence alignment - protein**

```

B73_TPS3      MYSLPGATMSAAPARVISSSSSSSFVEPLLLAAAS----SAAANSHHQVRQRGHLVRTL  56
W22_TPS2/3   MYSLPGATMSAAPARVISSSSSS-FVEPLLLAAASPAA-AAAANSHHQVRQRGHLVRTL  58
B73_TPS2     MYSLPGATMSAAPASIIIS---SSSFVEPLLLAAASPAAAAAAAAAANSHHQVRQRGHLVRTL  57
*****      :**  ** *****      :*****

B73_TPS3      ASSSNTLLRSDFDLQEGLTTDVKRMLRQRQKKSGGGREMLVTIDNLKRLCIDHFFEEEEI  116
W22_TPS2/3   ASSSNTLLRSDFDLQEGLTTDVKRMLRQR---SGGGREMLVTIDNLKRLCIDHYFEEEEI  115
B73_TPS2     ASSSNTLLRSDFDLQEGLTTDVKRMLRQRQKKSGGGREMLVTIDNLKRLCIDHYFEEEEI  117
*****      *****

B73_TPS3      EGAMATGACTRLLHSDDLDFATLAFRLREAGHDVSAKEDVLRRFIDGVSGDFKLSLND  176
W22_TPS2/3   EGAMATAACTGLLHSDDLDFATLAFRLREAGHDVSAKDDVLRRFIDGVSGDFKISLSND  175
B73_TPS2     EGAMATGACTRLLHSDDLDFATLAFRLREAGHDVSAKDDVLRRFIDGASGDFKLSLND  177
*****      *** *****

B73_TPS3      VRGLLGLHDMSHLDVGGEEAALLHRAKEFSSSHLASAVRYQDNPSLAEYVRQSLDHPYHL  236
W22_TPS2/3   VRGLLSLHDMSHLDVGG-EAALLHRAKEFSSRHLASAVRYLDDPSLAEYVRQSLDHPYHL  234
B73_TPS2     VRGLLSLHDMSHLDVGG-EAALLHRAKEFSSRHLASAVRYLDDPSLAEYVRQSLDHPYHL  236
*****      *****

B73_TPS3      SLTQYKARHHLRYLQSLPSSCR-DAVERLAVAQFQLNKS LHQREMREIKRWMDLGLAE  295
W22_TPS2/3   SLTQYKARHHLRYLQSLPCSCRVDAAVERLAVAQFQLNKS LHQREMREIKRWMDLGLAE  294
B73_TPS2     SLTQYKARHHLRYLQSLPS--R-DAVERLAVAQFQLNKS LHQREMREIKRWMDLGLAE  293
*****      * *****

B73_TPS3      EIPVVRDQVMKWMWSMAALQGSSFSRYR-----VYVVDIFDLVGTLEELSAFTE  346
W22_TPS2/3   EIPVVRDQVMKWMWSMAALQGSSFSRYRVEITKIIISLVYVVDIFDLVGTLEELSAFTE  354
B73_TPS2     EIPVVRDQVMKWMWSMAALQGSSFSRYRVEITKIIISLVYVVDIFDLVGTLEELSAFTE  353
*****      *****

B73_TPS3      AVKMWDTAAADSLPSCMRSCYKALHTVTNEIAEIAHKEHGSNPINRLRKAWVFLDFGMV  406
W22_TPS2/3   AVKMWDTVAADSLPSCMRSCYKALHTVTNEIAEIAHKEHGSDPINRLRKAWAVLDFGMV  414
B73_TPS2     AVKMWDTVAADSLPSCMRSCYKALHTVTNEIAEIAQKEHGSNHVNRLRKAWAVLDFGMV  413
*****      *****

B73_TPS3      EARWLATDQVPTAEDYLRNGVVTSGVPLTFLHIFSMGLGYDDP-STEEEEEAII DHMPSII  465
W22_TPS2/3   EARWLATDQVPTAEDYLRNGVITSGVPLTFLHIFSMGLGYDDRSTEEEEEAII DHMPSII  474
B73_TPS2     EARWLATDQVPTAEDYLRNGVITSGVPLTFMHIFSMGLGYDDP-STEEEEEAII DHMPSII  472
*****      *****

B73_TPS3      SCPAKILRLWDDMGSAE--DEAQEGFDGYSYRDFYLMENPSRSPGEAEAHMRGLIAREWVE  523
W22_TPS2/3   SCPAKILRLWDDMGSAEVVDEAQEGFDGYSYRDFYLMENPSRSPGEAEAHMRSLIMREWVE  534
B73_TPS2     SCPAKILRLWDDMGSAE--DEAQEGFDGYSYRDFYLMENPSRSPGEAEAHMRGLIAREWEV  530
*****      *****

B73_TPS3      LNRECFCRRTFPSDIAQVCLNTARMVSVMYSYNKEQRLLVLEDYAAMMLVL  574
W22_TPS2/3   LNRECFCRRTFPSDIAQVCLNTVRMVSVMYSYNKEQRLPVLEDYATMMLLV  585
B73_TPS2     LNRECFCRRTFPSNLVQVCLNTARMVSVMYSYNKEQRLPVLEDYAAMMLVL  581
*****      :. *****

```

B73\_TPS3 ACTCGCCCTATAAATTGGAGGGCCTGCGCTCACCTCGATGCATATCACTCAC----- 52  
 W22\_TPS2/3 ACTCGCCCTATAAATTGGAGGGCCTGCGCTCACCTCGATGCATATCACTCACTCACACTC 60  
 B73\_TPS2 ACTCGCCCTATAAATTGGAGGGCCTGCGCTCACCTGGATGCATATCACTCACTCACTCAC 60  
 \*\*\*\*\*

B73\_TPS3 -----TCACAAGCAGGCACAGCTAGCTGCTCACAGCTATAACATCGGCGCATCGCCATTA- 106  
 W22\_TPS2/3 ACAACTCACAAGCAGGCACAGCTAGCTGCTCACAGCTATAACATCGGCGCATCGCCATTA- 119  
 B73\_TPS2 A----ACACAAGCAGGCACAGCTAGCTGCTCACAGCTATAACATCGGCGCATCGCCATTA 116  
 \*\*\*\*\*

B73\_TPS3 ---GCAGCGGCTTGCTTTGGTTT-CTGATTGATTAGCTGGTTGTTGTTTCAGTTAGTTCGA 162  
 W22\_TPS2/3 ---CCAGCGGCTTGCTTTGGTTTTCTGATTGATTAGCTGGTTGTTGTTTCAGTTAGTTCGA 176  
 B73\_TPS2 TTAGCAGCGGCTTGCTTTGGTTT-CTGATTGATTAGCTGGTTGTTGTTTCAGTTAGTTCGA 175  
 \*\*\*\*\*

B73\_TPS3 GTAGTAGACGATGTACTCTCTACCAGGAGCAACCATGTCTGCTGCACCTGCACGCGTCAT 222  
 W22\_TPS2/3 GTAGTAGACGATGTACTCTCTACCAGGAGCAACCATGTCTGCTGCACCTGCACGCGTCAT 236  
 B73\_TPS2 GTAGTAGACGATGTACTCTCTACCAGGAGCAACCATGTCTGCTGCACCTGCAAGCATCAT 235  
 \*\*\*\*\* \*\*

B73\_TPS3 CTCTTCTCCTCCTCCTCCTCCTCCTTCGTGGAGCCTCTTCTCCTTGCAGCAGCTTCGTCGG- 281  
 W22\_TPS2/3 CTCTTCTCCTCCTCCTCCT---TCGTGGAGCCTCTTCTCCTTGCAGCAGCTTCGCCGGC 293  
 B73\_TPS2 CTCTTCTCCTCCT-----TCGTGGAGCCTCTTCTCCTTGCAGCAGCTTCGCCGGC 286  
 \*\*\*\*\*

B73\_TPS3 -----CGGC---TGCAAACAGCCACCACCAAGTCCGCCAGCGCGGCCACTTGGTCCG 330  
 W22\_TPS2/3 GCGCGCGCGGC---TGCAAACAGCCACCACCAAGTCCGCCAGCGCGGCCACTTGGTCCG 350  
 B73\_TPS2 GCGCGCAGCGGCAGCTGCAAACAGCCACCACCAAGTCCGCCAGCGCGGCCACTTGGTCCG 346  
 \*\*\*\*\*

B73\_TPS3 TACTTTGGCGGCATCATCGTCGTCCAACACGCTGCTGCGGAGTGACTTCGATCTCCAGGT 390  
 W22\_TPS2/3 TACTTTGGCGGCATCATCGTCGTCCAACACGCTGCTGCGGAGTGACTTCGATCTCCAGGT 410  
 B73\_TPS2 TACTTTGGCGGCATCATCGTCGTCCAACACGCTGCTGCGGAGTGACTTCGATCTCCAGGT 406  
 \*\*\*\*\*

B73\_TPS3 AGCTATCTGCTGCCTAGCAAAGACATGTCCATTTATCTTCTTCTTCTTTCATACATCAC 450  
 W22\_TPS2/3 AGCTATCCAGC---CTAGCAAAGACATGTCCATTTCTTCTTCTTCTTTCATACATCAC 467  
 B73\_TPS2 AGCTATCTGCTGCCTAGCAAAGACATGTCCATTTCTTCTTCTTCTTTCATACATCAC 461  
 \*\*\*\*\*

B73\_TPS3 CACATGCATGCT-----ATGCATGCTCCTCACTCTCCATACATGAAACATACATATGTA 502  
 W22\_TPS2/3 CACATGCATGCT-----ATGCATGCTCCTCACTCTCCATACATGAAACATACATATGTA 527  
 B73\_TPS2 CACATGCATGCT-----ATGCATGCTCCTCACTCTCCATACATGAAACATACATATGTA 513  
 \*\*\*\*\*

B73\_TPS3 CGTACGTAGGAGGGCCTGACGACGGACGTCAAACGGATGCTGCGTCAGCGTCAGAAGAAG 562  
 W22\_TPS2/3 CGTACGTAGGAGGGCCTGACGACGGACGTCAAACGGATGCTGCGTCAGCGT----- 578  
 B73\_TPS2 CGTACGTAGGAGGGCCTGACGACGGACGTCAAACGGATGCTGCGTCAGCGTCAGAAGAAG 573  
 \*\*\*\*\*

B73\_TPS3 AGCGGCGGCGGGCGGGAGATGCTGGTCAACATCGACAACCTCAAGCGCCTCTGCATCGAC 622  
 W22\_TPS2/3 AGCGGCGGCGGGCGGGAGATGCTGGTCAACATCGACAACCTCAAGCGCCTCTGCATCGAC 638  
 B73\_TPS2 AGCGGCGGCGGGCGGGAGATGCTGGTCAACATCGACAACCTCAAGCGCCTCTGCATCGAC 633  
 \*\*\*\*\*

B73\_TPS3 CACTTCTTCGAGGAAGAGATCGAGGGCGCCATGGCGACGGGCGCCTGCACGCGTCTCCTC 682  
 W22\_TPS2/3 CACTACTTCGAGGAAGAGATCGAGGGCGCCATGGCGACGGGCGCCTGCACGCGTCTCCTC 698  
 B73\_TPS2 CACTACTTCGAGGAAGAGATCGAGGGCGCCATGGCGACGGGCGCCTGCACGCGTCTCCTC 693  
 \*\*\*\*\*



B73\_TPS3 CACAGCGACGACCTCTTCGACGCAACACTCGCGTTCAGGCTCCTGAGAGAGGCAGGCCAT 742  
W22\_TPS2/3 CACAGCGACGACCTCTTCGACGCAACCTCGCGTTCAGGCTCCTGAGAGAGGCAGGCCAT 758  
B73\_TPS2 CACAGCGACGACCTCTTCGACGCAACCTCGCGTTCAGGCTCCTGAGAGAGGCAGGCAC 753  
\*\*\*\*\*

B73\_TPS3 GATGTCTCAGCAA GTTAGTAGTGATAAACACCCAGTAC----TACACACAGCAGACGAAA 798  
W22\_TPS2/3 GATGTCTCAGCAA GTTAGTAGTGATAAAAACCAAGTACATACTACACACAGCAGACGAAA 818  
B73\_TPS2 GATGTCTCAGCAA GTTAGTAGTGATAAACACCCAGTAC----TACACACAGCAGACGAAA 809  
\*\*\*\*\*

B73\_TPS3 GAAGAAAGAAATTAACATCTCGTCGTCGTCGTCGTCGTCATGTGCA-----TCTGCAGAA 852  
W22\_TPS2/3 GAAGAAAGAAATTAACATCTCGTCGTCGTCGTCGTCGTCATGTGCATGTGCATCTGCAGAA 878  
B73\_TPS2 GAAGAAAGAAATTAACATCTCGTCGTCGTCGTCGTCGTCATGTGCA-----TCTGCAGAA 863  
\*\*\*\*\*

B73\_TPS3 GAGGATGTTCTACGGAGGTTTCATCGACGGCGTCAGCGGCGACTTCAAGCTATCTCTGAAC 912  
W22\_TPS2/3 GACGATGTTCTACGGAGGTTTCATCGACGGCGTCAGCGGCGACTTCAAGATATCTCTGAGC 938  
B73\_TPS2 GACGATGTTCTACGCAGGTTTCATCGACGGCGCCAGCGGCGACTTCAAGCTATCTCTGAGC 923  
\*\* \*\*\*\*\*

B73\_TPS3 AACGACGTCAGAGGGCTCCTGGGCCTGCACGACATGTCCACCTGGACGTGGGAGGGGAG 972  
W22\_TPS2/3 AACGACGTCAGAGGGCTCCTGAGCCTGCACGACATGTCCACCTGGACGTGGGAGGGGAG 998  
B73\_TPS2 AACGACGTCAGAGGGCTCCTGAGCCTGCACGACATGTCCACCTGGACGTGGGAGGGGAG 983  
\*\*\*\*\*

B73\_TPS3 GAGGCGGCGCTGCTCCACAGGGCCAAGGAGTTCTCGAGCAGCCACCTCGCGTCCGCCCGTC 1032  
W22\_TPS2/3 G---CGGCGCTGCTCCACAGGGCCAAGGAGTTCTCGAGCAGCCACCTCGCGTCCGCCCGTC 1055  
B73\_TPS2 G---CGGCGCTGCTCCACAGGGCCAAGGAGTTCTCGAGCAGCCACCTCGCGTCCGCCCGTC 1040  
\* \*\*\*\*\*

B73\_TPS3 AGGTACCAGGACAACCCTAGCCTCGCGGAGTACGTGCGGCAGTCCCTGGACCACCCCTAC 1092  
W22\_TPS2/3 AGGTACCCTGGACGACCCTAGCCTCGCGGAGTACGTGCGGCAGTCCCTGGACCACCCCTAC 1115  
B73\_TPS2 AGGTACCCTGGACGACCCTAGCCTCGCGGAGTACGTGCGGCAGTCCCTGGACCACCCCTAC 1100  
\*\*\*\*\*

B73\_TPS3 CACCTCAGCCTGACGCAGTACAAGGCCAGGCATCACCTCCGCTACCTGCAGAGCCTGCC 1152  
W22\_TPS2/3 CACCTCAGCCTCACGCAGTACAAGGCCAGGCATCACCTCCGCTACCTGCAGAGCCTGCC 1175  
B73\_TPS2 CACCTCAGCCTGACGCAGTACAAGGCCAGGCATCACCTCCGCTACCTGCAGAGCCTGCC 1160  
\*\*\*\*\*

B73\_TPS3 TCCAGCTGCAGA---GACGCCGCCGTGGAGAGACTCGCAGTTGCCGAGTTCCAGCTCAAC 1209  
W22\_TPS2/3 TGCAGCTGCAGAGTGCAGGCCGCCGTGGAGAGACTCGCGGTGCCGAGTTCCAGCTCAAC 1235  
B73\_TPS2 TCCAG----AGA----CGCCGCCGTGGAGAGACTCGCAGTTGCCGAGTTCCAGCTCAAC 1211  
\* \*\* \* \*\*\*\*\*

B73\_TPS3 AAGTCGCTGCATCAGAGAGAGATGCGAGAGATTAAAAGGTACGTGTAACGATCTTGTGT 1269  
W22\_TPS2/3 AAGTCGCTGCATCAGAGAGAGATGCGAGAGATTAAAAGGTACGTGTAACGATCTTGTGT 1295  
B73\_TPS2 AAGTCGCTGCATCAGGGAGAGATGCGAGAGATTAAAAGGTACGT----- 1255  
\*\*\*\*\*

B73\_TPS3 TAGCTAGCTAGATCAGTTGACATGATATATTGTTTCGATTCTTCAGCAGTTTATGCAACT 1329  
W22\_TPS2/3 TAGCTAGCTAGATCAGTTGACATGATATATTGTTTCGATTCTTCAGCAGTTTATGTA ACT 1355  
B73\_TPS2 -----ACGTG-----T 1261  
\*\* \*\* \*

B73\_TPS3 AAAAAGAAAAAAA---TACTCCCTTCGCACCAAATAATATATAGTATGTTATAGGGTG 1386  
W22\_TPS2/3 AAAAAGAAAAAAAAGATACTCCTTTCGCACCAAATAATATATAGTATGTTATAGGGTG 1415  
B73\_TPS2 AAAG----- 1265  
\*\*\*

B73\_TPS3 TTAATAGTAGCTAGATTCATACAATATTTAATATATATACGTGTCTATATATTTATCGTC 1446  
W22\_TPS2/3 TTAATAGTAGCTACATTCATACAATATTTAATATATATGTACGTGTCTATATATTTATCGTC 1475  
B73\_TPS2 -----GTC 1268

B73\_TPS3 ATCTATTTGAATCTGGACACAAAAA-TTCGGAGCTAGAACGAACAATAAAAAAATTATTT 1505  
 W22\_TPS2/3 ATCTATTTGAATCTGGACATAAAAAA-TTTGGAGCTAGAACGAACAATAAAAAAATTATTT 1534  
 B73\_TPS2 ATCTATTTGAATCTGGACACAAAAAATTTGGAGCTAGAACGAACAATAA----- 1317  
 \*\*\*\*\*

B73\_TPS3 GCCAAGCGTGAGTGGCGTATTTTTTCTTCTTCTTCTTTTGTGTTGAGTTACAAAATGG 1565  
 W22\_TPS2/3 GCCAAGCGTGAGTGGCGTATTTTTTCTTCTTCTTCTTTTGTGTTGAGTTACAAAATAG 1594  
 B73\_TPS2 -----

B73\_TPS3 TGAGTGGCATATATT-TTTTTCTTCTTCTTTTGTGTTATGAGTTACAAAATGGTGAGATAT 1624  
 W22\_TPS2/3 TGAGTGGCATATATTATTTTTCTTCTTCTTTTGTGTTATGAGTTACAAAATGGTGAGATAT 1654  
 B73\_TPS2 -----TTTTTTTCTTCTTCTTCTGTTTATGAGTTACATAAATGGTGAGATAT 1364  
 \*\* \*\*\*\*\*

B73\_TPS3 TTGATCAACAAATATATATAATGTGATCGATGCAGGTGGTGGATGGACCTAGGGTTGGCT 1684  
 W22\_TPS2/3 TTGATCAACAAATATATATAATGTGATCGATGCAGGTGGTGGATGGACCTAGGGTTGGCT 1714  
 B73\_TPS2 TTGATCAACAAATATATATAATGTGATCGATGCAGGTGGTGGATGGACCTAGGGTTGGCT 1424  
 \*\*\*\*\*

B73\_TPS3 GAAGAAATACCTGTGGTACGGGATCAGGTGATGAAATGGTACATGTGGTCCATGGCAGCA 1744  
 W22\_TPS2/3 GAAGAAATACCTGTGGTACGGGATCAGGTGATGAAATGGTACATGTGGTCCATGGCAGCC 1774  
 B73\_TPS2 GAAGAAATACCTGTGGTACGGGATCAGGTGATGAAATGGTACATGTGGTCCATGGCAGCC 1484  
 \*\*\*\*\*

B73\_TPS3 CTCCAAGGATCTTCTTTCTCCAGATACCGGGTC----- 1777  
 W22\_TPS2/3 CTCCAAGGATCTTCTTCTCCAGATACCGGGTCGAGATCACCAAGATAATCTCGCTTGTT 1834  
 B73\_TPS2 CTCCAAGGATCTTCTTCTCCAGATACCGGGTCGAGATCACCAAGATAATCTCGCTTGTT 1544  
 \*\*\*\*\*

B73\_TPS3 TACGTCGTGGACGACATATTCGATCTCGTTGGCACCCCTGGAGGAGCTCTCCGCCTTCACC 1837  
 W22\_TPS2/3 TACGTCGTGGACGACATATTCGACCTAGTTGGCACCCCTGGAGGAGCTCTCCGCCTTCACC 1894  
 B73\_TPS2 TACGTCGTGGACGACATATTCGACCTCGTTGGCACCCCTGGAGGAGCTCTCCGCCTTCACC 1604  
 \*\*\*\*\*

B73\_TPS3 GAGGCAGTCAAAATGTAAGTAGTAGTAAATTTAAACTATATATATGTGTCTAGAAATTA 1897  
 W22\_TPS2/3 GAGGCAGTCAAAATGTAAGTAGTAGTAAATTTAGACTATATATATGTGTCTAGAAATTA 1954  
 B73\_TPS2 GAGGCAGTCAAAATGTAAGTAGTAGTAAATTTAGACTATATATATGTGTCTAGAAATTA 1664  
 \*\*\*\*\*

B73\_TPS3 TTAAAAGCTATACAACCACAATTAACATAGTAGTAAATATTGTTTTAGAGTGAAGGGGAA 1957  
 W22\_TPS2/3 TTAAAAGCTATACAACCACAATTAACATAGTAGTAAATATTGTTTTAGAGTGAAGGGGAA 2014  
 B73\_TPS2 TTAAAAGCTATACAACCACAATTAACATAGTAGTAAATATTGTTTTAGAGTGAAGGGGAA 1724  
 \*\*\*\*\*

B73\_TPS3 ATAGCTAGTAAA-----CAATGCTAA 1978  
 W22\_TPS2/3 ATAGCTAGTAAATATTGTTGTTGTTGTTGTTGTTGTTGTTGTTAATTTAAACAATGTTAA 2074  
 B73\_TPS2 ATAGCTAGTAAATATTGTTGTTGTTGTTGTTGTTGTTGTTGTTAATTTAAACAATGTTAA 1784  
 \*\*\*\*\*

B73\_TPS3 TATATATGAGAAAAAAACCCACAACATTGGCTGCAGGTGGGATACTGCGGCTGCTGATTC 2038  
 W22\_TPS2/3 TATATATGAGAAAAAA-CCCACAACACTGGCTGCAGGTGGGATACTGCGGCTGCTGATTC 2133  
 B73\_TPS2 TATATATGAGAAAAAA-CCCACAACACTGGCTGCAGGTGGGATACTGCGGCTGCTGATTC 1843  
 \*\*\*\*\*

B73\_TPS3 ACTTCCCAGTTGCATGAGATCATGCTATAAAGGCCCTCCACACCGTTACGAACGAGATCGC 2098  
 W22\_TPS2/3 ACTTCCCTAGTTGCATGAGATCATGCTATAAAGGCCCTCCACACCGTTACGAACGAGATCGC 2193  
 B73\_TPS2 ACTTCCCAGTTGCATGAGATCATGCTATAAAGGCCCTCCACACCGTTACGAACGAGATCGC 1903  
 \*\*\*\*\*

B73\_TPS3 AGAGATTGCCACAAGGAGCATGGATCTAACCCTATCAATCGTCTCAGGAAAGCA GTATG 2158  
 W22\_TPS2/3 AGAGATTGCCACAAGGAGCATGGATCTGACCCTATCAATCGTCTCAGGAAAGCA GTATG 2253  
 B73\_TPS2 AGAGATTGCCAGAAGGAGCATGGATCTAACCATGTCAATCGTCTTAGGAAAGCA GTATG 1963

B73\_TPS3 TTCATAAACACCTTTATCTTATGTATGCTTCTCTTCGGTTTGATCAAGACAAACATTCAT 2218  
 W22\_TPS2/3 TTCATAAACACCTTTATCTTATGTATGCTTCTCTTCAGTTTGATCAAGACAAACATCCAT 2313  
 B73\_TPS2 TTCATAAACACCTTTATCTTATGTATGCTTCTCTTCAGTTTGATCAAGACAAACATCCAT 2023  
 \*\*\*\*\*  
 B73\_TPS3 AAATAAATAAA--AAATATACCAGTTGATTTAAAACCTGGTTAAAATGATTCATAAATAA 2275  
 W22\_TPS2/3 AAATAAATAAA--AAATATACCAGTTGATTTAAAACCTGGTTAAAACGATTCATAAATAA 2370  
 B73\_TPS2 AAATAAATAAATAAATAAATAAATAAATAAATAAATAAATAAATAAATAAATAAATAAATAA 2083  
 \*\*\*\*\*  
 B73\_TPS3 ATCAGTTTCTGCTGCTAATGATCGAGCAACTGCTTACGCTAGCTAGAAATCCAACAACG 2335  
 W22\_TPS2/3 ATCAGTTTACTGCTGCTAATGATCGAGCAACTGCTAAAGCTAGCTAGAAATCCAACAACG 2430  
 B73\_TPS2 ATAAGTTTACTGCTGCTAATGATCGAGCAACTCCTAACGCTAGCTACAAAT-----CG 2136  
 \*\* \*\*\*\*\* \*\* \* \*\*\*\*\* \*\* \*\*  
 B73\_TPS3 TAACTTTGTGTAGTGGGTGGTGTCTGTTTCGACGGTTTCATGGTTGAGGCGAGATGGCTAGC 2395  
 W22\_TPS2/3 TAACTTTGTGCAGTGGGCGGTGTCTGTTTTCGACGGTTTCATGGTTGAGGCGAGATGGCTAGC 2490  
 B73\_TPS2 TAACTTTGTGCAGTGGGCGGTGTCTGTTTTCGACGGTTTCATGGTTGAGGCGAGATGGCTAGC 2196  
 \*\*\*\*\*  
 B73\_TPS3 GACCGACCAGGTCCCTACGGCGGAGGACTACCTACGAAATGGCGTGCATCACATCAGGAGT 2455  
 W22\_TPS2/3 GACCGACCAGGTCCCTATGGCGGAGGACTACCTACGAAACGGCGTGCATCACATCAGGAGT 2550  
 B73\_TPS2 GACCGACCAAGTCCCTACGGCGGAGGACTACCTACGAAACGGCGTGCATCACATCAGGAGT 2256  
 \*\*\*\*\*  
 B73\_TPS3 GCCGCTCACATTTCTGCACATATTCAGCATGCTAGGGTATGATGAC---CCAAGCACCGA 2512  
 W22\_TPS2/3 GCCACTCACATTTCTGCACATATTCAGCATGCTAGGGTATGATGACGATCGAAGCACCGA 2610  
 B73\_TPS2 GCCGCTCACATTTATGCACATATTCAGCATGCTAGGGTATGATGAC---CCAAGCACCGA 2313  
 \*\*\* \*\*\*\*\* \* \*\*\*\*\*  
 B73\_TPS3 GGAAGAAGAAGAAGCGATCATCGACCACATGCCCTCGATCATCTCTGCCAGCCAAGAT 2572  
 W22\_TPS2/3 GGAAGAAGAAGAAGCGATCATCGACCACATGCCCTCGATCATCTCTGCCAGCCAAGAT 2670  
 B73\_TPS2 GGAAGAAGAAGAAGCGATCATCGACCACATGCCCTCAATCATCTCTGCCAGCCAAGAT 2373  
 \*\*\*\*\*  
 B73\_TPS3 CCTCAGGCTCTGGGATGACATGGGCAGCGCAGAGGTCGTTGTTAGTTCGTCGAACCATAAC 2632  
 W22\_TPS2/3 CCTCAGGCTCTGGGATGACATGGGCAGCGCAGAGGTCGTTGTTAGTTCGTCGAACCATAAC 2730  
 B73\_TPS2 CCTCAGGCTCTGGGATGACATGGGCAGCGCAGAGGTCGTCGTTAGTTCATCGAACCATAAC 2433  
 \*\*\*\*\*  
 B73\_TPS3 ACTACATA--CTAGCTTGTTAATTAATGCTTTTACCTTCAAATTTTGCAATCCAATCAT 2690  
 W22\_TPS2/3 ACTACATA--CTAGCTTGTTAATTAATGCTTTTACCTTCAAATTTTGCAATCCAATCAT 2788  
 B73\_TPS2 ACTACATATACTAGCTTGTTAATTAATGCTTTTACCTTCAAATTTTGCAATCCAATCGT 2493  
 \*\*\*\*\*  
 B73\_TPS3 ACTTGATGTGTGCATGGGCTTTGCAGGATGAGGCTCAGGAAGGATTCGATGGGTCTTACA 2750  
 W22\_TPS2/3 ACTTGATGTGTGCATGGGCTTTGCAGGATGAGGCTCAAGAAGGATTCGATGGGTCTTACA 2848  
 B73\_TPS2 ACTTGATGTGTGCATGGGCTTTGCAGGATGAGGCTCAGGAAGGATTCGATGGGTCTTACA 2553  
 \*\*\*\*\*  
 B73\_TPS3 GGGACTTCTACCTCATGGAGAACCCTAGCCGAGCCCCGGCGAGGCGGAAGCGCACATGC 2810  
 W22\_TPS2/3 GGGACTTCTACCTCATGGAGAACCCTAGCCGAGCCCCGGCGAGGCGGAAGCGCACATGC 2908  
 B73\_TPS2 GGGACTTCTACCTCATGGAGAACCCTAGCCGAGCCCCGGCGAGGCGGAAGCGCACATGC 2613  
 \*\*\*\*\*  
 B73\_TPS3 GCGGCCATGATCGCGAGGGAGTGGGTGGAGCTCAACAGGGAGTGCTTCTGCCGAGGACCT 2870  
 W22\_TPS2/3 GCAGCCTGATCATGAGGGAGTGGGTGGAGCTCAACAGGGAGTGCTTCTGCAGGAGGACCT 2968  
 B73\_TPS2 GCGGCCATGATCGCGAGGGAGTGGGTGGAGTGGTCAACAGGGAGTGCTTCTGCAGGAGGACCT 2673  
 \*\* \*\*\* \*\* \*\*\*\*\* \*\* \*\*\*\*\*
